# Supplementary material for: Effect of Metal Ions on the Interaction of Condensed Tannins with Protein
Source: MDPI journal article supplement (doi:10.3390/foods12040829), 2023-02-15
Supplement: s1 [file s1]

**Supplemental Figure S1.** The influence of  $\text{Zn}^{2+}$  (a),  $\text{Cu}^{2+}$  (b),  $\text{Al}^{3+}$  (c), and  $\text{Fe}^{2+}$  (d) (0.05-1.0  $\mu\text{mol}$ ) on the amount of precipitated sorghum CT by 0.025  $\mu\text{mol}$  BSA in the condition of reaction solution contains 1 mg sorghum CT. Means with different lower case on the top of bar are significantly different ( $P < 0.05$ ).

**Supplemental Figure S2.** The influence of  $\text{Zn}^{2+}$  (a),  $\text{Cu}^{2+}$  (b),  $\text{Al}^{3+}$  (c), and  $\text{Fe}^{2+}$  (d) (0.05-1.0  $\mu\text{mol}$ ) on the amount of precipitated plum CT by 0.025  $\mu\text{mol}$  BSA in the condition of reaction solution contains 1 mg plum CT. Means with different lower case on the top of bar are significantly different ( $P < 0.05$ ).

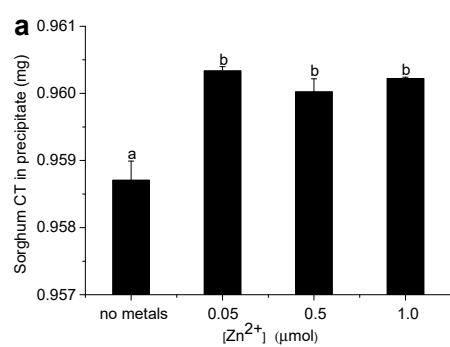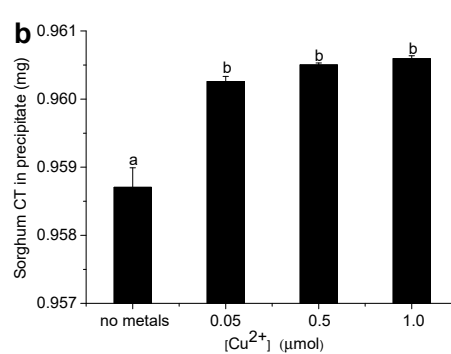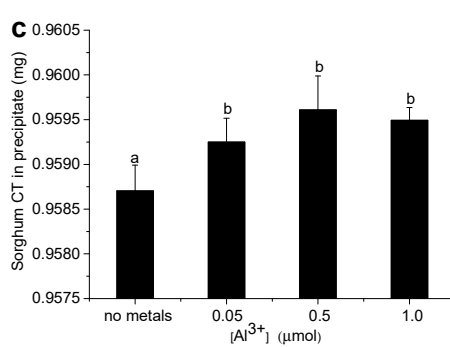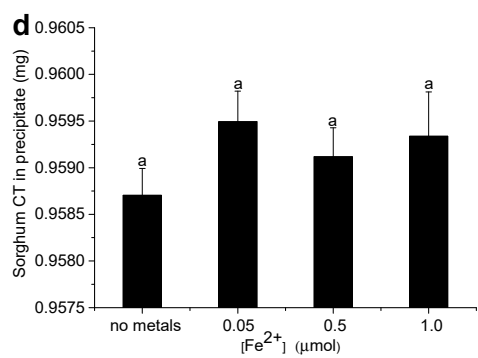

Supplemental Figure S1

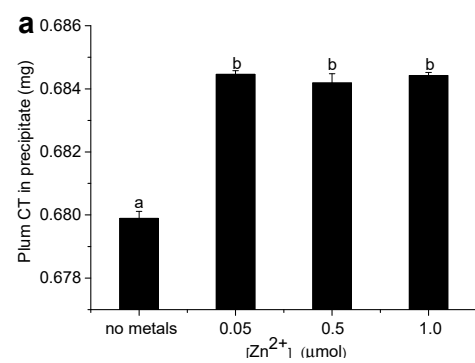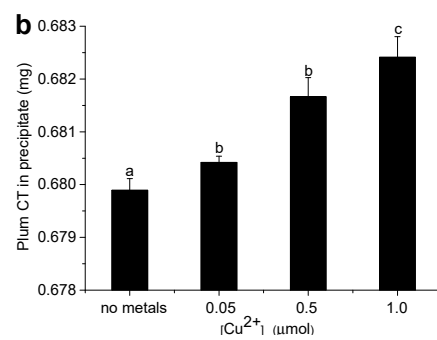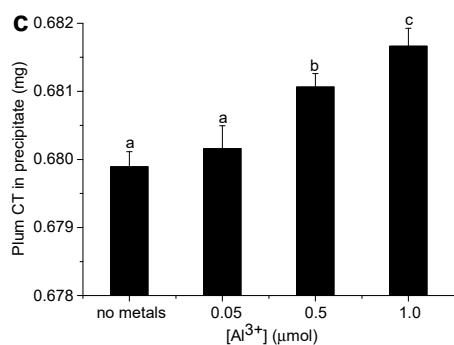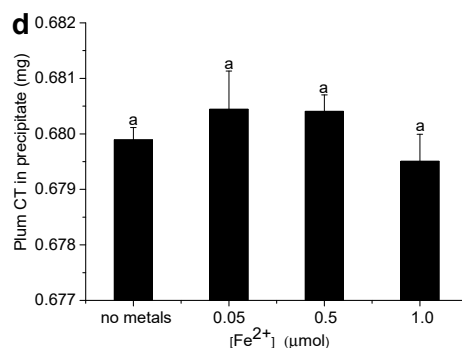

Supplemental Figure S2
